# Supplementary material for: Salivary And Urine Metabomic Profile Of Patients Living With Hiv/aids, And Its Association With Periodontal Disease
Source: Preprints.org preprint supplement (doi:10.20944/preprints202403.1175.v1), 2024-03-19
Supplement: Supplementary file 1 [file supplementary]

31

**Mar, 2022**

**Relatório de Análise Científica de Dados**

**Relatório de Análises**

**Cliente**: Viviane Balero Cosse de Sousa

**Analista**: Dr. Heury Ferr

Sumário

[Metodologia 4](#_Toc99638343)

[1 – Análises para Urina 5](#_Toc99638344)

[Comparando as áreas entre os grupos 5](#_Toc99638345)

[25 metabólitos mais representativos quanto a área em cada grupo 6](#_Toc99638346)

[GRUPO G1 7](#_Toc99638347)

[GRUPO G2 8](#_Toc99638348)

[GRUPO G3 9](#_Toc99638349)

[GRUPO G4 10](#_Toc99638350)

[Comparando os metabólitos via diagrama de Venn 11](#_Toc99638351)

[Grupos 11](#_Toc99638352)

[Detalhando o Diagrama em tabela 12](#_Toc99638353)

[1 – Análises para Saliva 13](#_Toc99638354)

[25 metabólitos mais representativos quanto a área em cada grupo 14](#_Toc99638355)

[GRUPO G1 14](#_Toc99638356)

[GRUPO G2 15](#_Toc99638357)

[GRUPO G3 16](#_Toc99638358)

[GRUPO G4 17](#_Toc99638359)

[Comparando os metabólitos via diagrama de Venn 18](#_Toc99638360)

[Comparando saliva vs urina 19](#_Toc99638361)

[Somente para grupo G1 19](#_Toc99638362)

[Somente para grupo G2 20](#_Toc99638363)

[Somente para grupo G3 21](#_Toc99638364)

[Somente para o grupo G4 21](#_Toc99638365)

[Referências 23](#_Toc99638366)

# Metodologia

Viviane boa tarde, utilizamos os softwares Origin Pro e Statistica 12 para gerar para você os gráficos e análises. Utilizamos as técnicas de Anova com teste LSD de fisher a posteriori para comparação das áreas entre os grupos, construção do Diagrama de Venn e teste de qui-quadrado para comparação dos metabólitos únicos entre os grupos e diferentes momentos.

Seguem os resultados e em um arquivo em excel tabelas detalhadas contendo a frequência e nome dos metabólitos presentes nos diagramas de Venn.

# 1 – Análises para Urina

# Comparando as áreas entre os grupos


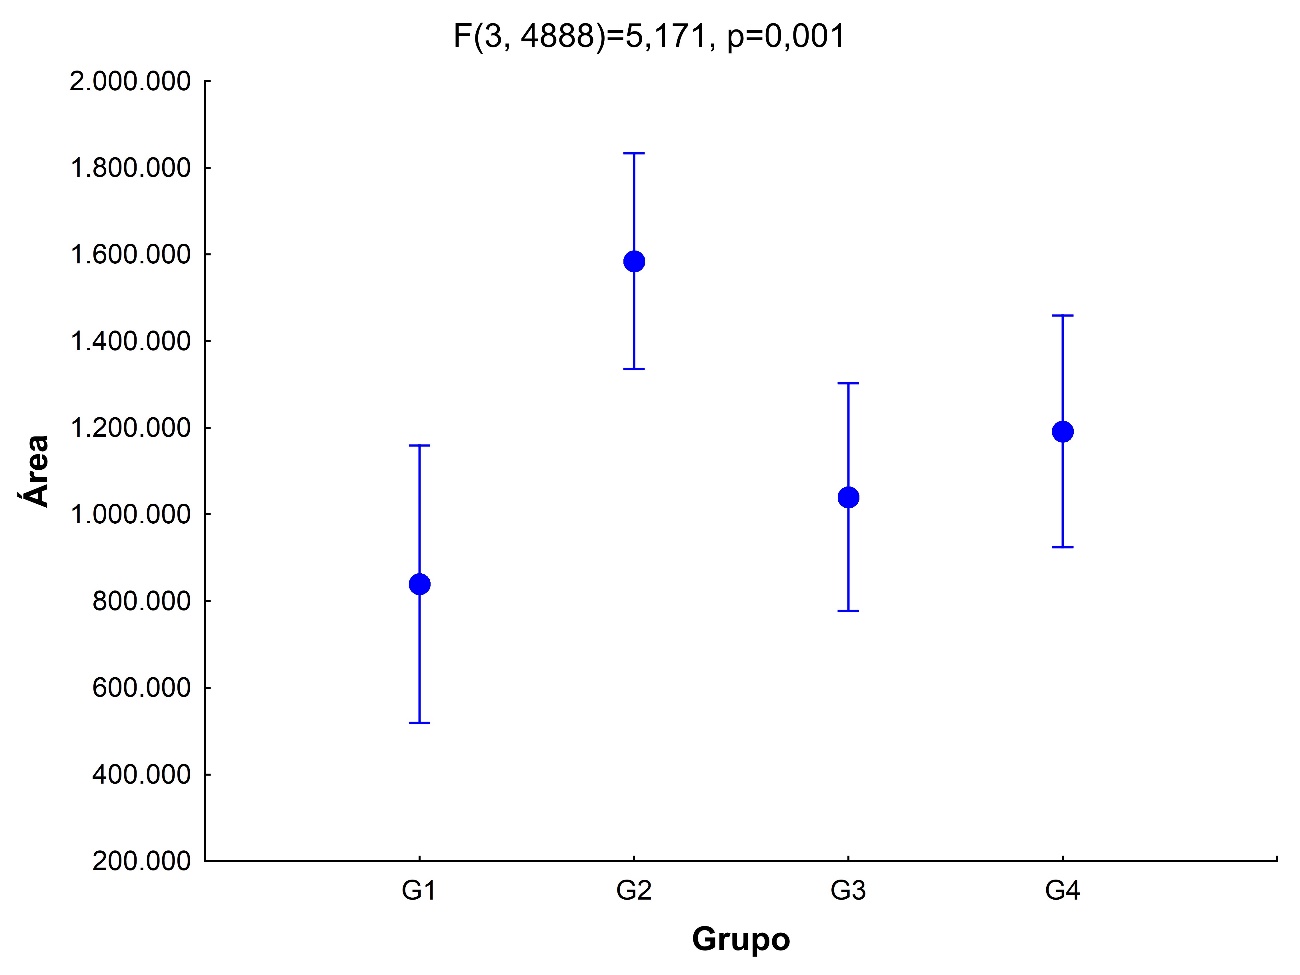


**Figura 1**. Anova comparando as médias de área para os 4 grupos. As barras denotam intervalo de confiança de 95% em torno da média.

**Técnica utilizada**: Anova com teste a posteriori LSD de Fisher.

**Explicando**: Viviane são 4 médias a serem comparadas, só são consideradas estatisticamente significativas aquelas comparações cujo valor de p for menor que 0.05. A anova primeiro testa se ao menor uma das médias difere das demais, depois conduzimos o teste a posteriori para saber quais pares diferem entre si. Em seguida representamos essas diferenças em um gráfico contendo nas médias (bolinhas em azul abaixo) e os intervalos de confiança (IC) de 95% (barras). Sempre que dois grupos têm intervalos não sobrepostos, as médias deles são estatisticamente distintas. Exemplo, veja abaixo que G1 e G2 têm intervalos não sobrepostos (se você imaginar o intervalo de G2 se movendo pra esquerda, ele fica embaixo do G1, eles não se tocam, esse não se tocar significa estatisticamente diferente). Já G3 e G4 se sobrepõem, portanto, não há diferenças estatísticas significativas entre eles (se você imaginar a barrinha do G4 se movendo pra esquerda, vai ver que ela esbarra no G3, portanto, não há diferenças estatísticas significativas entre eles).

**Interpretação**: O grupo 2 tem a maior área. Há diferenças estatísticas significativas entre G1 e G2 (p=0,0003), sendo G2 maior que G1. A área de G2 é maior que G3 (p=0,003), e maior que G4 (p=0,034). Não há diferenças entre G3 e G4 (p=0,427), nem entre G1 e G3 (p=0,341), nem entre G1 e G4 (p=0,09). Obs.: Os números em parênteses na parte superior do gráfico são os graus de liberdade da análise, F é a estatística F de Fisher, um número abstrato, quanto maior ele é, mais diferenças existem entre as médias, e o p na parte superior do gráfico é o P estatístico da Anova (esse P indica se há ao menos uma diferença entre as médias, os demais valores de P são encontrados com o teste a posteriori, para apontar quais médias diferem. Só se faz o teste a posteriori se esse primeiro p da anova for significativo).

Em números termos:

| Grupo | Média | DP | Média - IC 95% | Média + IC 95% |
| --- | --- | --- | --- | --- |
| G1 | 839049 | 163116,3 | 519268 | 1158831 |
| G2 | 1584567 | 126826,4 | 1335930 | 1833204 |
| G3 | 1040023 | 139487,8 | 766539 | 1313507 |
| G4 | 1191700 | 141962,7 | 913364 | 1470037 |

**Tabela 1**. Médias, desvio padrão (DP), os limites inferior e superior do intervalo de confiança de 95% em torno da média.

# 25 metabólitos mais representativos quanto a área em cada grupo

**Obs.**: abaixo média se refere a área média do metabólito, e desvio padrão a seu desvio padrão.

## GRUPO G1

| Metabólito | | | Média | DP |
| --- | --- | --- | --- | --- |
|  |  | 1,3,5-Triazine, 2,4,6-tris[(trimethylsilyl)oxy]- | 8865952 | 710467 |
|  |  | Propanoic acid, 2-[(trimethylsilyl)oxy]-, trimethylsilyl ester | 6207136 | 653534 |
|  |  | N-Ethyl-5-propyl-5-nonanamine | 5473310 | 1666193 |
|  |  | Hexadecanoic acid, 2,3-bis[(trimethylsilyl)oxy]propyl ester | 4234076 | 745144 |
|  |  | Glycine, N-(trimethylsilyl)-, trimethylsilyl ester | 4222151 | 710467 |
|  |  | Ethanimidic acid, N-(trimethylsilyl)-, trimethylsilyl ester | 3913242 | 1360441 |
|  |  | Bis(trimethylsilyl)monostearin | 3646899 | 745144 |
|  |  | L-Proline, 1-(trimethylsilyl)-, trimethylsilyl ester | 3594686 | 745144 |
|  |  | 2,4,6-Tri-t-butylbenzenethiol | 2639443 | 1666193 |
|  |  | Benzonitrile, 4-(2-methyl-1,3-dioxolan-2-yl)- | 2623687 | 462119 |
|  |  | D-Glucose, 4-O-[2,3,4,6-tetrakis-O-(trimethylsilyl)-.beta.-D-galactopyranosyl]-2,3,5,6-tetrakis-O-(trimethylsilyl)- | 2623670 | 1666193 |
|  |  | Urea, N,N'-bis(trimethylsilyl)- | 2614503 | 453480 |
|  |  | l-Alanine, N-(trimethylsilyl)-, trimethylsilyl ester | 2521168 | 785451 |
|  |  | Octadecanoic acid, trimethylsilyl ester | 2429429 | 745144 |
|  |  | Glucose, pentakis-O-trimethylsilyl- | 2187543 | 1666193 |
|  |  | Pentanoic acid, 5-[bis(trimethylsilyl)amino]-, trimethylsilyl ester | 1907578 | 785451 |
|  |  | 1-(3-Methylbutyl)-2,3,4,6-tetramethylbenzene | 1468944 | 1053793 |
|  |  | 3-(3,5-di-tert-butyl-4-hydroxyphenyl)propionic acid | 1407772 | 1053793 |
|  |  | .alpha.-D-Glucopyranoside, 1,3,4,6-tetrakis-O-(trimethylsilyl)-.beta.-D-fructofuranosyl 2,3,4,6-tetrakis-O-(trimethylsilyl)- | 1350668 | 555398 |
|  |  | L-Valine, N-(trimethylsilyl)-, trimethylsilyl ester | 1059684 | 833096 |
|  |  | 3-Diazo-1-methyl-1,3-dihydro-indol-2-one | 978722 | 2356352 |
|  |  | .beta.-L-Mannopyranose, 6-deoxy-1,2,3,4-tetrakis-O-(trimethylsilyl)- | 792553 | 480988 |
|  |  | Glucopyranose pentaTMS | 791134 | 1666193 |
|  |  | Hexadecanoic acid, trimethylsilyl ester | 790838 | 745144 |
|  |  | Benzene, 1-(1,3-dimethyl-3-butenyl)-4-fluoro- | 744349 | 1053793 |

**Tabela 2**. Os 25 metabólitos de maior área no grupo G1, p<0.0001 (ou seja, há diferenças estatísticas significativas).

## GRUPO G2

| Metabólito | | | Média | DP |
| --- | --- | --- | --- | --- |
|  |  | D-Glucopyranose, 4-O-[2,3,4,6-tetrakis-O-(trimethylsilyl)-.beta.-D-galactopyranosyl]-1,2,3,6-tetrakis-O-(trimethylsilyl)- | 54130868 | 3646427 |
|  |  | Talose, 2,3,4,5,6-pentakis-O-(trimethylsilyl)- | 43096150 | 3646427 |
|  |  | D-Fructose, 1,3,4,5,6-pentakis-O-(trimethylsilyl)- | 32580927 | 2578413 |
|  |  | .beta.-D-Galactofuranose, 1,2,3,5,6-pentakis-O-(trimethylsilyl)- | 27413320 | 3646427 |
|  |  | .beta.-D-Glucopyranose, 1,2,3,4,6-pentakis-O-(trimethylsilyl)- | 26772088 | 2578413 |
|  |  | D-Mannopyranose, 1,2,3,4,6-pentakis-O-(trimethylsilyl)- | 21864900 | 3646427 |
|  |  | Arabinofuranose, 1,2,3,5-tetrakis-O-(trimethylsilyl)- | 20942458 | 3646427 |
|  |  | D-Glucose, 4-O-[2,3,4,6-tetrakis-O-(trimethylsilyl)-.beta.-D-galactopyranosyl]-2,3,5,6-tetrakis-O-(trimethylsilyl)- | 15713470 | 2105265 |
|  |  | Propanoic acid, 2-[(trimethylsilyl)oxy]-, trimethylsilyl ester | 14436441 | 1153101 |
|  |  | Maltose, octakis(trimethylsilyl)- | 12848208 | 3646427 |
|  |  | D-Fructose, 6-O-[2,3,4,6-tetrakis-O-(trimethylsilyl)-.alpha.-D-glucopyranosyl]-1,3,4,5-tetrakis-O-(trimethylsilyl)- | 11735572 | 3646427 |
|  |  | D-Galactose, 2,3,4,5,6-pentakis-O-(trimethylsilyl)- | 10441678 | 1718942 |
|  |  | D-Glucose, 4-O-[2,3,4,6-tetrakis-O-(trimethylsilyl)-.beta.-D-glucopyranosyl]-2,3,5,6-tetrakis-O-(trimethylsilyl)- | 9125283 | 3646427 |
|  |  | 1,3,5-Triazine, 2,4,6-tris[(trimethylsilyl)oxy]- | 8417359 | 1183057 |
|  |  | Acrylic acid, 2,3-bis[(trimethylsilyl)oxy]-, trimethylsilyl ester | 5871478 | 3646427 |
|  |  | Hexadecanoic acid, 2,3-bis[(trimethylsilyl)oxy]propyl ester | 4725717 | 1250714 |
|  |  | Bis(trimethylsilyl)monostearin | 4703488 | 1331487 |
|  |  | Benzonitrile, 4-(2-methyl-1,3-dioxolan-2-yl)- | 4516857 | 897688 |
|  |  | Ethanimidic acid, N-(trimethylsilyl)-, trimethylsilyl ester | 4203803 | 3646427 |
|  |  | .alpha.-D-Glucopyranoside, 1,3,4,6-tetrakis-O-(trimethylsilyl)-.beta.-D-fructofuranosyl 2,3,4,6-tetrakis-O-(trimethylsilyl)- | 3834960 | 795716 |
|  |  | D-Turanose, heptakis(trimethylsilyl)- | 3732689 | 1250714 |
|  |  | Urea, N,N'-bis(trimethylsilyl)- | 2828885 | 701755 |
|  |  | Octadecanoic acid, trimethylsilyl ester | 2211092 | 1183057 |
|  |  | Glucose, pentakis-O-trimethylsilyl- | 2187543 | 2578413 |
|  |  | Glycine, N-(trimethylsilyl)-, trimethylsilyl ester | 2140387 | 1488647 |

**Tabela 3**. Os 25 metabólitos de maior área no grupo G2, p<0.0001.

## GRUPO G3

| Metabólito | Média | DP |
| --- | --- | --- |
| .beta.-D-Galactofuranose, 1,2,3,5,6-pentakis-O-(trimethylsilyl)- | 64909445 | 3638542 |
| D-Fructose, 1,3,4,5,6-pentakis-O-(trimethylsilyl)- | 50559713 | 2572838 |
| Talose, 2,3,4,5,6-pentakis-O-(trimethylsilyl)- | 45271460 | 3638542 |
| .beta.-D-Glucopyranose, 1,2,3,4,6-pentakis-O-(trimethylsilyl)- | 43726768 | 2100713 |
| D-Glucose, 4-O-[2,3,4,6-tetrakis-O-(trimethylsilyl)-.beta.-D-glucopyranosyl]-2,3,5,6-tetrakis-O-(trimethylsilyl)- | 38610758 | 2572838 |
| Hexopyranose, 1,2,3,4,6-pentakis-O-(trimethylsilyl)- | 24080346 | 3638542 |
| D-Glucopyranose, 4-O-[2,3,4,6-tetrakis-O-(trimethylsilyl)-.beta.-D-galactopyranosyl]-1,2,3,6-tetrakis-O-(trimethylsilyl)- | 15958348 | 2100713 |
| Inosose-2, 1,3,4,5,6-pentakis-O-(trimethylsilyl)-, myo- | 15513174 | 3638542 |
| D-Ribofuranose, 1,2,3,5-tetrakis-O-(trimethylsilyl)- | 13662867 | 3638542 |
| Maltose, octakis(trimethylsilyl)- | 13546098 | 2572838 |
| Propanoic acid, 2-[(trimethylsilyl)oxy]-, trimethylsilyl ester | 10854091 | 1097062 |
| Dihydroxyacetone dimer, tetra(trimethylsilyl)- | 7785312 | 3638542 |
| D-Xylopyranose, 1,2,3,4-tetrakis-O-(trimethylsilyl)- | 7544071 | 3638542 |
| (.+/-.)-2,3-Butanediol diTMS | 6635889 | 3638542 |
| Benzonitrile, 4-(2-methyl-1,3-dioxolan-2-yl)- | 6302249 | 758688 |
| .alpha.-L-Galactofuranose, 6-deoxy-1,2,3,5-tetrakis-O-(trimethylsilyl)- | 5392053 | 3638542 |
| D-Turanose, heptakis(trimethylsilyl)- | 5341013 | 1009150 |
| Phenol, 2,4-bis(1,1-dimethylethyl)- | 4607213 | 2572838 |
| Glucofuranoside, methyl 2,3,5,6-tetrakis-O-(trimethylsilyl)-, .alpha.-D- | 4213623 | 2572838 |
| .alpha.-D-Glucopyranoside, 1,3,4,6-tetrakis-O-(trimethylsilyl)-.beta.-D-fructofuranosyl 2,3,4,6-tetrakis-O-(trimethylsilyl)- | 4080467 | 813603 |
| 2,4,6-Tri-t-butylbenzenethiol | 2836874 | 1375240 |
| Ethanimidic acid, N-(trimethylsilyl)-, trimethylsilyl ester | 2836511 | 1819271 |
| Ethylbis(trimethylsilyl)amine | 2601776 | 3638542 |
| L-Proline, 1-(trimethylsilyl)-, trimethylsilyl ester | 2498879 | 1819271 |
| 2,6-Octadiene, 3,7-dimethyl-1-(hydroxydimethylsilyl)-1-(trimethylsilyl)- | 2206954 | 3638542 |

**Tabela 4**. Os 25 metabólitos de maior área no grupo G3, p<0.0001.

## GRUPO G4

| Metabólito | Média | DP |
| --- | --- | --- |
| D-Glucopyranose, 4-O-[2,3,4,6-tetrakis-O-(trimethylsilyl)-.beta.-D-galactopyranosyl]-1,2,3,6-tetrakis-O-(trimethylsilyl)- | 54130868 | 4002282 |
| Talose, 2,3,4,5,6-pentakis-O-(trimethylsilyl)- | 43096150 | 4002282 |
| D-Glucose, 4-O-[2,3,4,6-tetrakis-O-(trimethylsilyl)-.beta.-D-galactopyranosyl]-2,3,5,6-tetrakis-O-(trimethylsilyl)- | 41893070 | 4002282 |
| D-Fructose, 1,3,4,5,6-pentakis-O-(trimethylsilyl)- | 32580927 | 2830041 |
| .beta.-D-Galactofuranose, 1,2,3,5,6-pentakis-O-(trimethylsilyl)- | 27413320 | 4002282 |
| .beta.-D-Glucopyranose, 1,2,3,4,6-pentakis-O-(trimethylsilyl)- | 26772088 | 2830041 |
| D-Mannopyranose, 1,2,3,4,6-pentakis-O-(trimethylsilyl)- | 21864900 | 4002282 |
| Arabinofuranose, 1,2,3,5-tetrakis-O-(trimethylsilyl)- | 20942458 | 4002282 |
| Maltose, octakis(trimethylsilyl)- | 12848208 | 4002282 |
| D-Fructose, 6-O-[2,3,4,6-tetrakis-O-(trimethylsilyl)-.alpha.-D-glucopyranosyl]-1,3,4,5-tetrakis-O-(trimethylsilyl)- | 11735572 | 4002282 |
| D-Galactose, 2,3,4,5,6-pentakis-O-(trimethylsilyl)- | 9490839 | 1789875 |
| Propanoic acid, 2-[(trimethylsilyl)oxy]-, trimethylsilyl ester | 9218777 | 1069655 |
| D-Glucose, 4-O-[2,3,4,6-tetrakis-O-(trimethylsilyl)-.beta.-D-glucopyranosyl]-2,3,5,6-tetrakis-O-(trimethylsilyl)- | 9125283 | 4002282 |
| 1,3,5-Triazine, 2,4,6-tris[(trimethylsilyl)oxy]- | 8596650 | 1033385 |
| D-Turanose, heptakis(trimethylsilyl)- | 7561628 | 2001141 |
| .alpha.-D-Glucopyranoside, 1,3,4,6-tetrakis-O-(trimethylsilyl)-.beta.-D-fructofuranosyl 2,3,4,6-tetrakis-O-(trimethylsilyl)- | 6501577 | 1155359 |
| Acrylic acid, 2,3-bis[(trimethylsilyl)oxy]-, trimethylsilyl ester | 5871478 | 4002282 |
| Hexadecanoic acid, 2,3-bis[(trimethylsilyl)oxy]propyl ester | 5513926 | 1033385 |
| Benzonitrile, 4-(2-methyl-1,3-dioxolan-2-yl)- | 4065195 | 743205 |
| Bis(trimethylsilyl)monostearin | 3612728 | 1069655 |
| 2,4,6-Tri-t-butylbenzenethiol | 3550449 | 2310719 |
| Glucose, pentakis-O-trimethylsilyl- | 2902541 | 4002282 |
| Ethanimidic acid, N-(trimethylsilyl)-, trimethylsilyl ester | 2629166 | 2830041 |
| 1H-Indole-3-methanamine, N,N-dimethyl- | 2593132 | 4002282 |
| L-Proline, 1-(trimethylsilyl)-, trimethylsilyl ester | 2582950 | 1415021 |

**Tabela 5**. Os 25 metabólitos de maior área no grupo G4, p<0.0001.

# Comparando os metabólitos via diagrama de Venn

Essa análise permite identificar quais metabólitos estão presentes em cada grupo, e quantos e quais metabólitos os grupos compartilham entre si. A lista detalhada não cabe aqui, está enviada anexada em uma planilha em excel chamada resultados complementares. Vamos aos resultados.


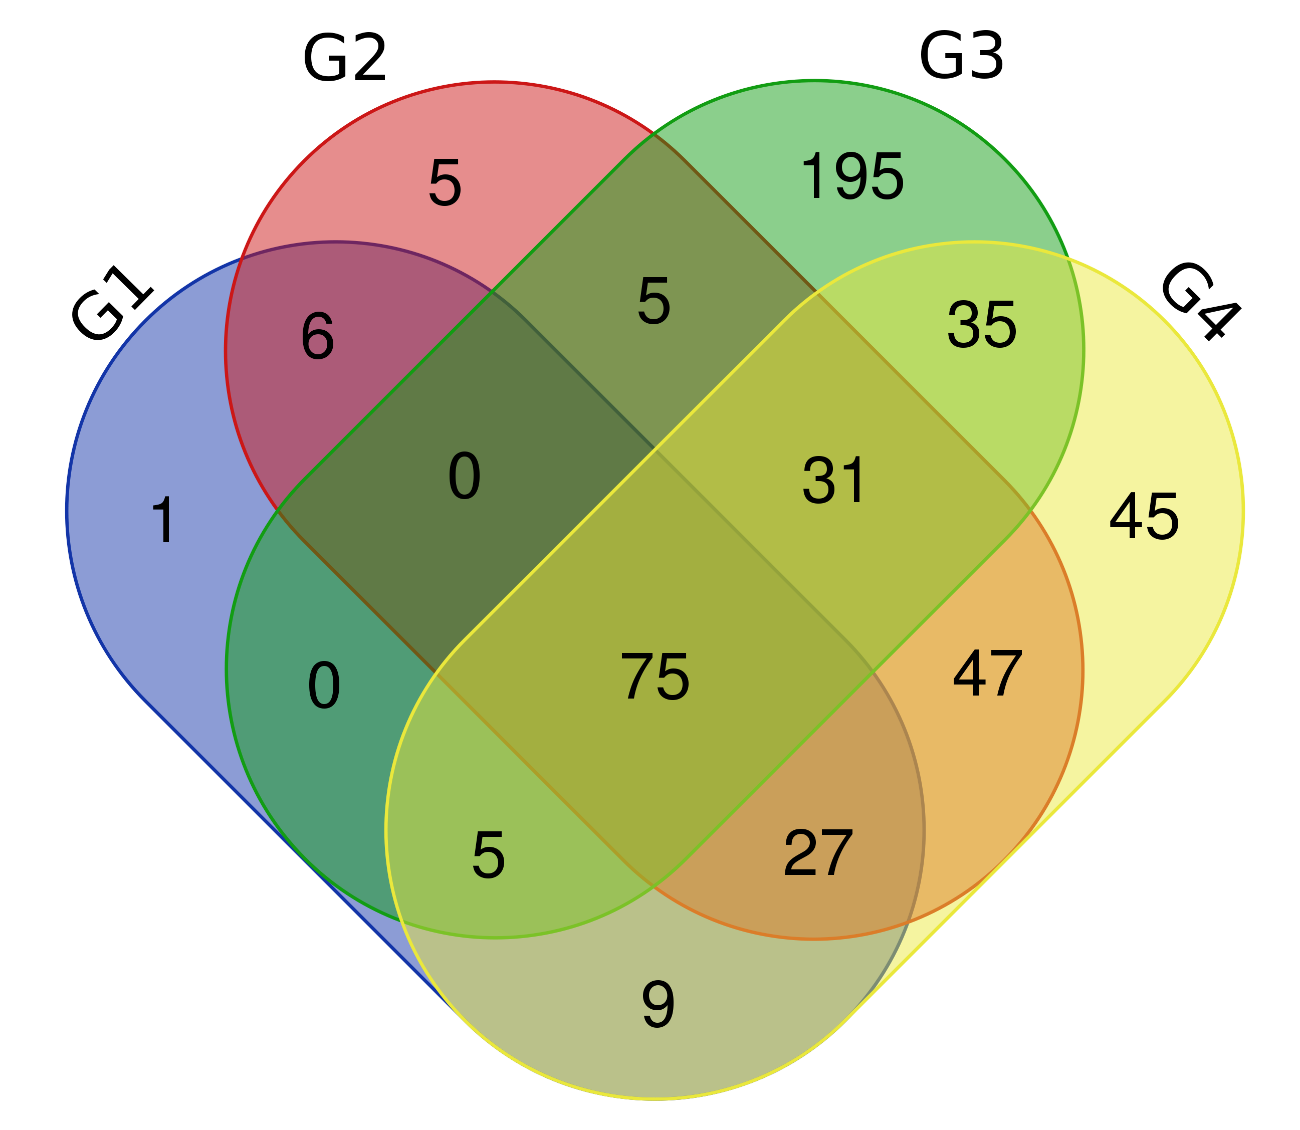


**Figura 2**. Diagrama de Venn entre os grupos.

# Grupos

| Grupo | Número de metabólitos | Número de metabólitos únicos |
| --- | --- | --- |
| G1 | 878 | 123 |
| G2 | 1453 | 196 |
| G3 | 1300 | 346 |
| G4 | 1256 | 274 |
| Número total de metabólitos únicos | | 486 |

**Tabela 6**. Frequências no diagrama de Venn.

Para testar se as diferenças na tabela acima são estatisticamente significativas utilizamos o teste de qui-quadrado. Encontramos que há diferenças estatísticas significativas entre o número de metabólitos únicos em cada grupo (Χ2=118.88, GL=3, p<0.00001).

**Observação**: X2=estatística de qui-quadrado, número abstrato, quanto maior este número, mais diferenças. GL=graus de liberdade da comparação. E o valor de p reflete a significância estatística, só são considerados significativos resultados com p<0.05.

## Detalhando o Diagrama em tabela

Viviane, a lista de cada metabólito contido no diagrama de Venn está no arquivo em excel em anexo, não houve forma de fazê-la caber de modo legível aqui no relatório.

# 1 – Análises para Saliva


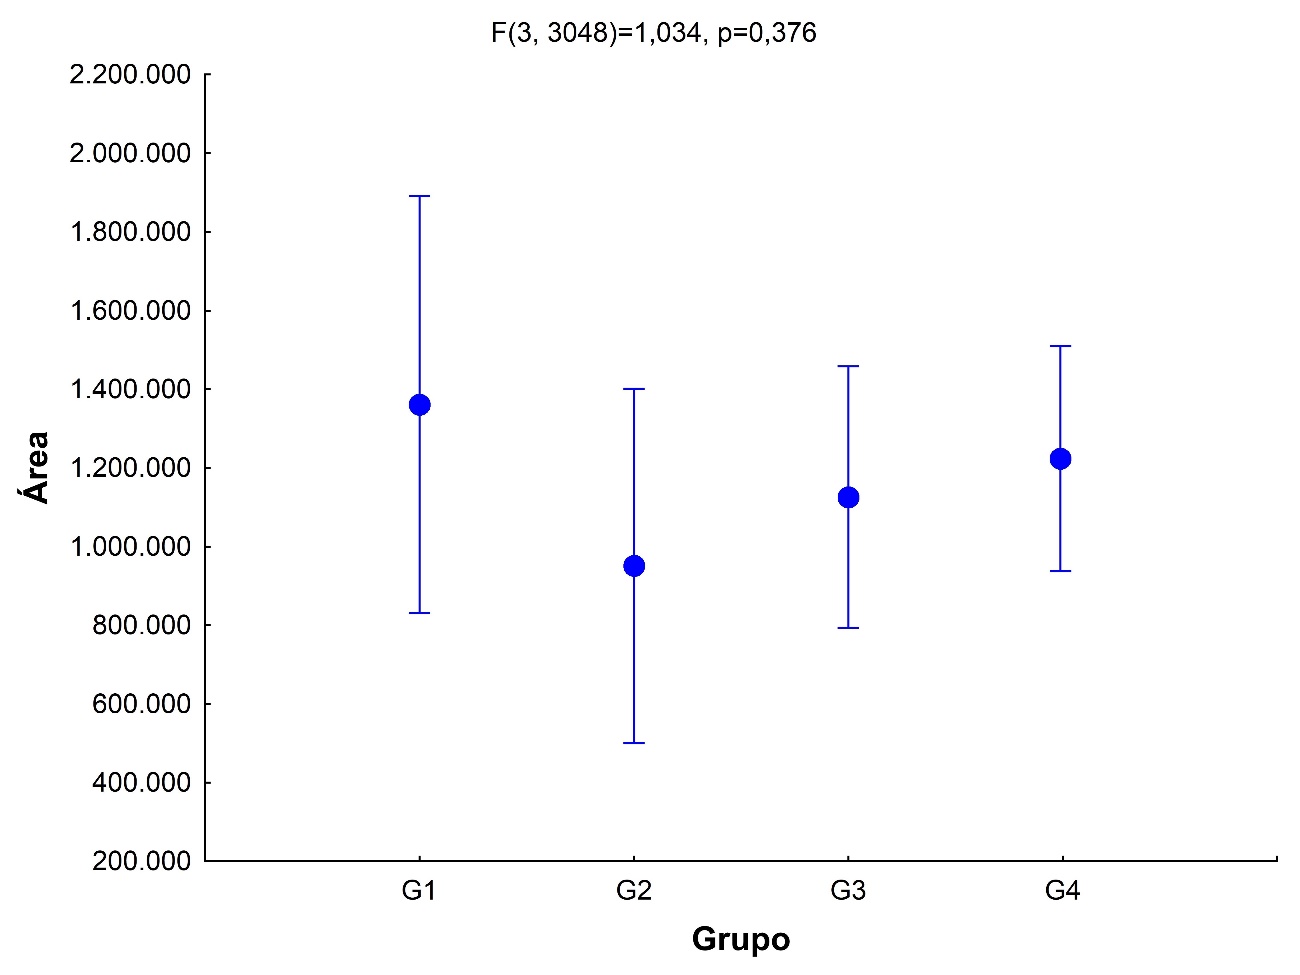


**Figura 3.** Anova para dados de Saliva.

**Interpretação**: Não há diferenças estatísticas significativas ao se comparar os grupos para as áreas dos metabólitos para saliva (p=0,376).

| Grupo | Média | DP | Média - IC 95% | Média + IC 95% |
| --- | --- | --- | --- | --- |
| G1 | 1360668 | 270405,7 | 830472 | 1890864 |
| G2 | 950794 | 229888,1 | 500042 | 1401545 |
| G3 | 1052931 | 116612,6 | 824295 | 1281567 |
| G4 | 1222791 | 117792,0 | 991843 | 1453740 |

**Tabela 7**. Médias, desvio padrão e intervalo de confiança para a área dos grupos.

# 25 metabólitos mais representativos quanto a área em cada grupo

**Obs.**: abaixo média se refere a área média do metabólito, e desvio padrão a seu desvio padrão.

## GRUPO G1

| Metabólito | | | Média | DP |
| --- | --- | --- | --- | --- |
|  |  | Galactose-meto-5TMS(2) | 28932614 | 4670991 |
|  |  | Glucose-meto-5TMS(2) | 28614032 | 4670991 |
|  |  | Isomaltose-meto-8TMS(2) | 17457895 | 4670991 |
|  |  | 1,6-Anhydroglucose-3TMS | 15798295 | 4670991 |
|  |  | Glycine-3TMS | 13662378 | 4670991 |
|  |  | Mannitol-6TMS | 13361370 | 4670991 |
|  |  | Citric acid-4TMS | 11716427 | 4670991 |
|  |  | Serine-3TMS | 11041226 | 3813848 |
|  |  | Isocitric acid-4TMS | 10433067 | 6605779 |
|  |  | Isoleucine-2TMS | 9334604 | 4670991 |
|  |  | Arabitol-5TMS | 7824703 | 4670991 |
|  |  | Vanilmandelic acid-3TMS | 5070400 | 6605779 |
|  |  | Threonic acid-4TMS | 5030182 | 4670991 |
|  |  | Glycine-2TMS | 4960489 | 3813848 |
|  |  | 2-Aminoethanol-3TMS | 4061667 | 3813848 |
|  |  | Cysteine-3TMS | 3912423 | 4670991 |
|  |  | Sucrose-8TMS | 3640156 | 4670991 |
|  |  | Palmitic acid-TMS | 3057804 | 4670991 |
|  |  | 4-Hydroxyphenyllactic acid-3TMS | 3035529 | 6605779 |
|  |  | Threitol-4TMS | 2941068 | 4670991 |
|  |  | 2-Deoxy-glucose-4TMS(1) | 2783354 | 4670991 |
|  |  | Ribonic acid-5TMS | 2650150 | 6605779 |
|  |  | Alanine-2TMS | 2616988 | 6605779 |
|  |  | Glucuronic acid-meto-5TMS(2) | 2598801 | 6605779 |
|  |  | 2-Hydroxyglutaric acid-3TMS | 2564823 | 4670991 |

**Tabela 8**. Os 25 metabólitos de maior área no grupo G1, p=0.993 (ou seja, não há diferenças estatísticas significativas).

## GRUPO G2

| Metabólito | | | Média | DP |
| --- | --- | --- | --- | --- |
|  |  | Proline-2TMS | 28353197 | 5674798 |
|  |  | Mannitol-6TMS | 16556688 | 2537847 |
|  |  | 1,6-Anhydroglucose-3TMS | 13358231 | 2537847 |
|  |  | Glucose-meto-5TMS(2) | 13022293 | 2837399 |
|  |  | Palmitic acid-TMS | 8594207 | 3276346 |
|  |  | Citric acid-4TMS | 6910706 | 2837399 |
|  |  | Leucine-2TMS | 6263040 | 3276346 |
|  |  | Cadaverine-3TMS | 5831356 | 2837399 |
|  |  | Isocitric acid-4TMS | 5369195 | 4012688 |
|  |  | Vanilmandelic acid-3TMS | 5084182 | 5674798 |
|  |  | 2-Hydroxyglutaric acid-3TMS | 3877160 | 5674798 |
|  |  | Serine-3TMS | 3833007 | 3276346 |
|  |  | Indol-3-acetic acid-2TMS | 3719565 | 5674798 |
|  |  | Threonic acid-4TMS | 3291717 | 3276346 |
|  |  | Aconitic acid-3TMS | 3193806 | 5674798 |
|  |  | meso-Erythritol-4TMS | 2222647 | 3276346 |
|  |  | Arabitol-5TMS | 2075037 | 2537847 |
|  |  | Sucrose-8TMS | 2074208 | 2837399 |
|  |  | Isoleucine-2TMS | 2014361 | 3276346 |
|  |  | Cysteine-3TMS | 1973099 | 2837399 |
|  |  | Threitol-4TMS | 1911564 | 3276346 |
|  |  | Threonine-3TMS | 1525751 | 4012688 |
|  |  | 4-Hydroxyphenylacetic acid-2TMS | 1353572 | 5674798 |
|  |  | Glucuronic acid-meto-5TMS(2) | 1297058 | 4012688 |
|  |  | Ribonic acid-5TMS | 1296552 | 4012688 |

**Tabela 9**. Os 25 metabólitos de maior área no grupo G2, p=0.999, não há diferenças estatísticas significativas.

## GRUPO G3

| Metabólito | Média | DP |
| --- | --- | --- |
| .beta.-D-Galactofuranose, 1,2,3,5,6-pentakis-O-(trimethylsilyl)- | 64909445 | 3638542 |
| D-Fructose, 1,3,4,5,6-pentakis-O-(trimethylsilyl)- | 50559713 | 2572838 |
| Talose, 2,3,4,5,6-pentakis-O-(trimethylsilyl)- | 45271460 | 3638542 |
| .beta.-D-Glucopyranose, 1,2,3,4,6-pentakis-O-(trimethylsilyl)- | 43726768 | 2100713 |
| D-Glucose, 4-O-[2,3,4,6-tetrakis-O-(trimethylsilyl)-.beta.-D-glucopyranosyl]-2,3,5,6-tetrakis-O-(trimethylsilyl)- | 38610758 | 2572838 |
| Hexopyranose, 1,2,3,4,6-pentakis-O-(trimethylsilyl)- | 24080346 | 3638542 |
| D-Glucopyranose, 4-O-[2,3,4,6-tetrakis-O-(trimethylsilyl)-.beta.-D-galactopyranosyl]-1,2,3,6-tetrakis-O-(trimethylsilyl)- | 15958348 | 2100713 |
| Inosose-2, 1,3,4,5,6-pentakis-O-(trimethylsilyl)-, myo- | 15513174 | 3638542 |
| D-Ribofuranose, 1,2,3,5-tetrakis-O-(trimethylsilyl)- | 13662867 | 3638542 |
| Maltose, octakis(trimethylsilyl)- | 13546098 | 2572838 |
| Propanoic acid, 2-[(trimethylsilyl)oxy]-, trimethylsilyl ester | 10854091 | 1097062 |
| Dihydroxyacetone dimer, tetra(trimethylsilyl)- | 7785312 | 3638542 |
| D-Xylopyranose, 1,2,3,4-tetrakis-O-(trimethylsilyl)- | 7544071 | 3638542 |
| (.+/-.)-2,3-Butanediol diTMS | 6635889 | 3638542 |
| Benzonitrile, 4-(2-methyl-1,3-dioxolan-2-yl)- | 6302249 | 758688 |
| .alpha.-L-Galactofuranose, 6-deoxy-1,2,3,5-tetrakis-O-(trimethylsilyl)- | 5392053 | 3638542 |
| D-Turanose, heptakis(trimethylsilyl)- | 5341013 | 1009150 |
| Phenol, 2,4-bis(1,1-dimethylethyl)- | 4607213 | 2572838 |
| Glucofuranoside, methyl 2,3,5,6-tetrakis-O-(trimethylsilyl)-, .alpha.-D- | 4213623 | 2572838 |
| .alpha.-D-Glucopyranoside, 1,3,4,6-tetrakis-O-(trimethylsilyl)-.beta.-D-fructofuranosyl 2,3,4,6-tetrakis-O-(trimethylsilyl)- | 4080467 | 813603 |
| 2,4,6-Tri-t-butylbenzenethiol | 2836874 | 1375240 |
| Ethanimidic acid, N-(trimethylsilyl)-, trimethylsilyl ester | 2836511 | 1819271 |
| Ethylbis(trimethylsilyl)amine | 2601776 | 3638542 |
| L-Proline, 1-(trimethylsilyl)-, trimethylsilyl ester | 2498879 | 1819271 |
| 2,6-Octadiene, 3,7-dimethyl-1-(hydroxydimethylsilyl)-1-(trimethylsilyl)- | 2206954 | 3638542 |

**Tabela 10**. Os 25 metabólitos de maior área no grupo G3, p<0.0001.

## GRUPO G4

| Metabólito | Média | DP |
| --- | --- | --- |
| D-Glucopyranose, 4-O-[2,3,4,6-tetrakis-O-(trimethylsilyl)-.beta.-D-galactopyranosyl]-1,2,3,6-tetrakis-O-(trimethylsilyl)- | 54130868 | 4002282 |
| Talose, 2,3,4,5,6-pentakis-O-(trimethylsilyl)- | 43096150 | 4002282 |
| D-Glucose, 4-O-[2,3,4,6-tetrakis-O-(trimethylsilyl)-.beta.-D-galactopyranosyl]-2,3,5,6-tetrakis-O-(trimethylsilyl)- | 41893070 | 4002282 |
| D-Fructose, 1,3,4,5,6-pentakis-O-(trimethylsilyl)- | 32580927 | 2830041 |
| .beta.-D-Galactofuranose, 1,2,3,5,6-pentakis-O-(trimethylsilyl)- | 27413320 | 4002282 |
| .beta.-D-Glucopyranose, 1,2,3,4,6-pentakis-O-(trimethylsilyl)- | 26772088 | 2830041 |
| D-Mannopyranose, 1,2,3,4,6-pentakis-O-(trimethylsilyl)- | 21864900 | 4002282 |
| Arabinofuranose, 1,2,3,5-tetrakis-O-(trimethylsilyl)- | 20942458 | 4002282 |
| Maltose, octakis(trimethylsilyl)- | 12848208 | 4002282 |
| D-Fructose, 6-O-[2,3,4,6-tetrakis-O-(trimethylsilyl)-.alpha.-D-glucopyranosyl]-1,3,4,5-tetrakis-O-(trimethylsilyl)- | 11735572 | 4002282 |
| D-Galactose, 2,3,4,5,6-pentakis-O-(trimethylsilyl)- | 9490839 | 1789875 |
| Propanoic acid, 2-[(trimethylsilyl)oxy]-, trimethylsilyl ester | 9218777 | 1069655 |
| D-Glucose, 4-O-[2,3,4,6-tetrakis-O-(trimethylsilyl)-.beta.-D-glucopyranosyl]-2,3,5,6-tetrakis-O-(trimethylsilyl)- | 9125283 | 4002282 |
| 1,3,5-Triazine, 2,4,6-tris[(trimethylsilyl)oxy]- | 8596650 | 1033385 |
| D-Turanose, heptakis(trimethylsilyl)- | 7561628 | 2001141 |
| .alpha.-D-Glucopyranoside, 1,3,4,6-tetrakis-O-(trimethylsilyl)-.beta.-D-fructofuranosyl 2,3,4,6-tetrakis-O-(trimethylsilyl)- | 6501577 | 1155359 |
| Acrylic acid, 2,3-bis[(trimethylsilyl)oxy]-, trimethylsilyl ester | 5871478 | 4002282 |
| Hexadecanoic acid, 2,3-bis[(trimethylsilyl)oxy]propyl ester | 5513926 | 1033385 |
| Benzonitrile, 4-(2-methyl-1,3-dioxolan-2-yl)- | 4065195 | 743205 |
| Bis(trimethylsilyl)monostearin | 3612728 | 1069655 |
| 2,4,6-Tri-t-butylbenzenethiol | 3550449 | 2310719 |
| Glucose, pentakis-O-trimethylsilyl- | 2902541 | 4002282 |
| Ethanimidic acid, N-(trimethylsilyl)-, trimethylsilyl ester | 2629166 | 2830041 |
| 1H-Indole-3-methanamine, N,N-dimethyl- | 2593132 | 4002282 |
| L-Proline, 1-(trimethylsilyl)-, trimethylsilyl ester | 2582950 | 1415021 |

**Tabela 11**. Os 25 metabólitos de maior área no grupo G4, p<0.0001.

# Comparando os metabólitos via diagrama de Venn

Novamente, essa análise permite identificar quais metabólitos estão presentes em cada grupo, e quantos e quais metabólitos os grupos compartilham entre si. A lista detalhada não cabe aqui, está enviada anexada em uma planilha em excel chamada resultados complementares. Vamos aos resultados.


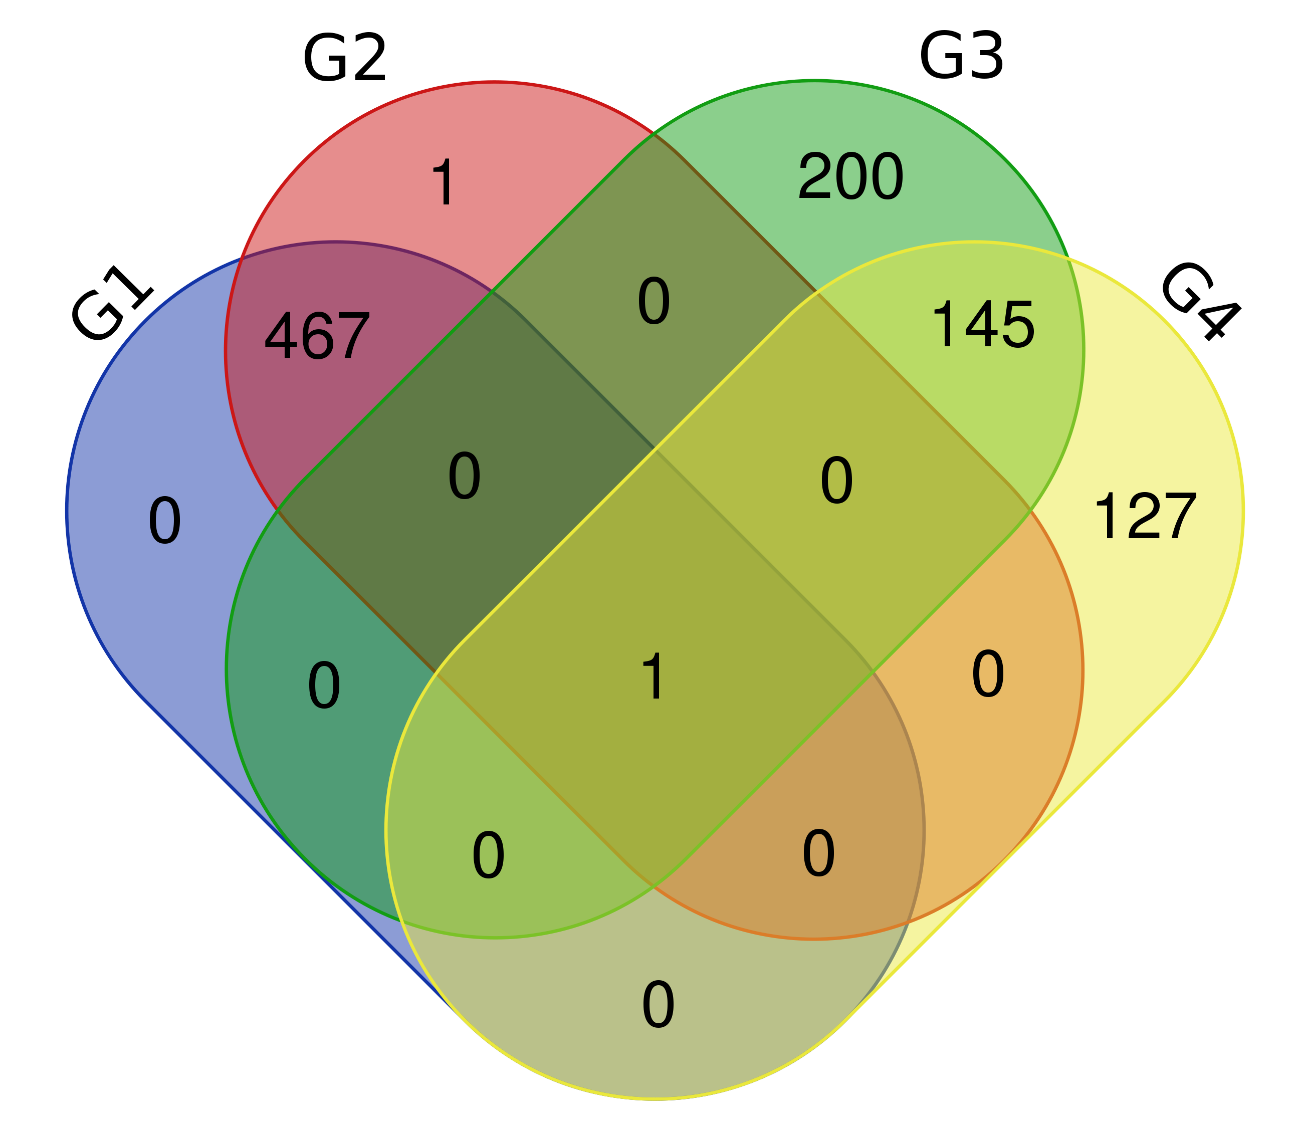


**Figura 4**. Diagrama de Venn comparando os grupos.

| Grupo | Número de metabólitos | Número de metabólitos únicos |
| --- | --- | --- |
| G1 | 1092 | 468 |
| G2 | 2244 | 469 |
| G3 | 1300 | 346 |
| G4 | 1254 | 273 |
| Número total de metabólitos únicos | | 941 |

**Tabela 12**. Frequências no diagrama de Venn.

Para testar se as diferenças na tabela acima são estatisticamente significativas utilizamos o teste de qui-quadrado. Encontramos que há diferenças estatísticas significativas entre o número de metabólitos únicos em cada grupo (Χ2=71.84, GL=3, p<0.00001).

Lista detalhada dos metabólitos no arquivo em excel em anexo.

# Comparando saliva vs urina

## Somente para grupo G1


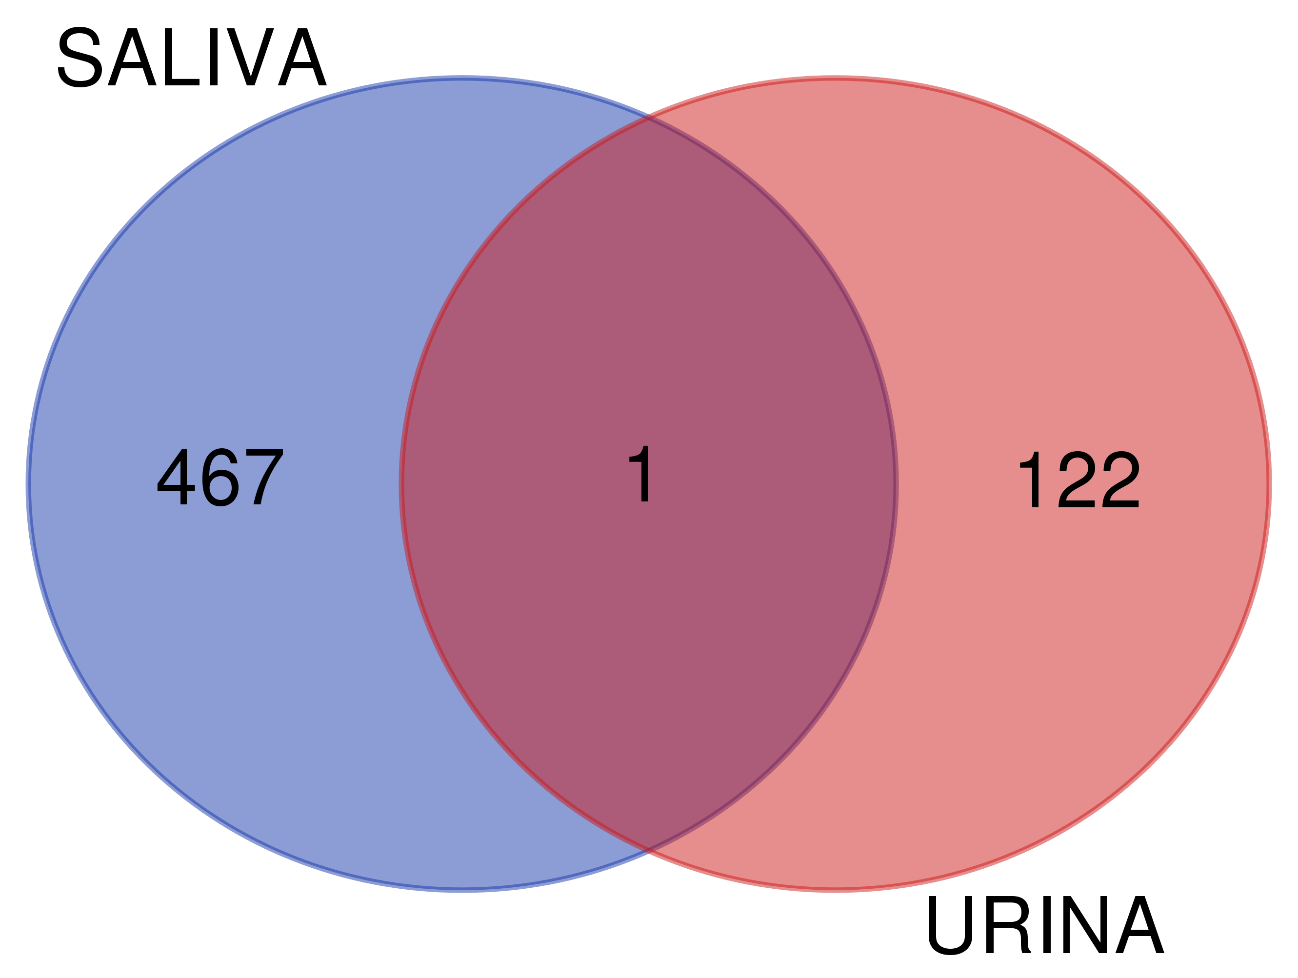


**Figura 5**. Diagrama de Venn.

| Tipo | Elementos | Elementos únicos |
| --- | --- | --- |
| SALIVA | 1253 | 273 |
| URINA | 1256 | 274 |
| Total de elementos únicos | | **274** |
|  | |  |

**Tabela 13**. Frequências no diagrama de Venn.

Para testar se as diferenças na tabela acima são estatisticamente significativas utilizamos o teste de qui-quadrado. Encontramos que não há diferenças estatísticas significativas entre o número de metabólitos únicos em cada Tipo (Χ2=0.001, GL=1, p=0.966).

Tabela detalhada no arquivo complementar em excel.

## Somente para grupo G2

**
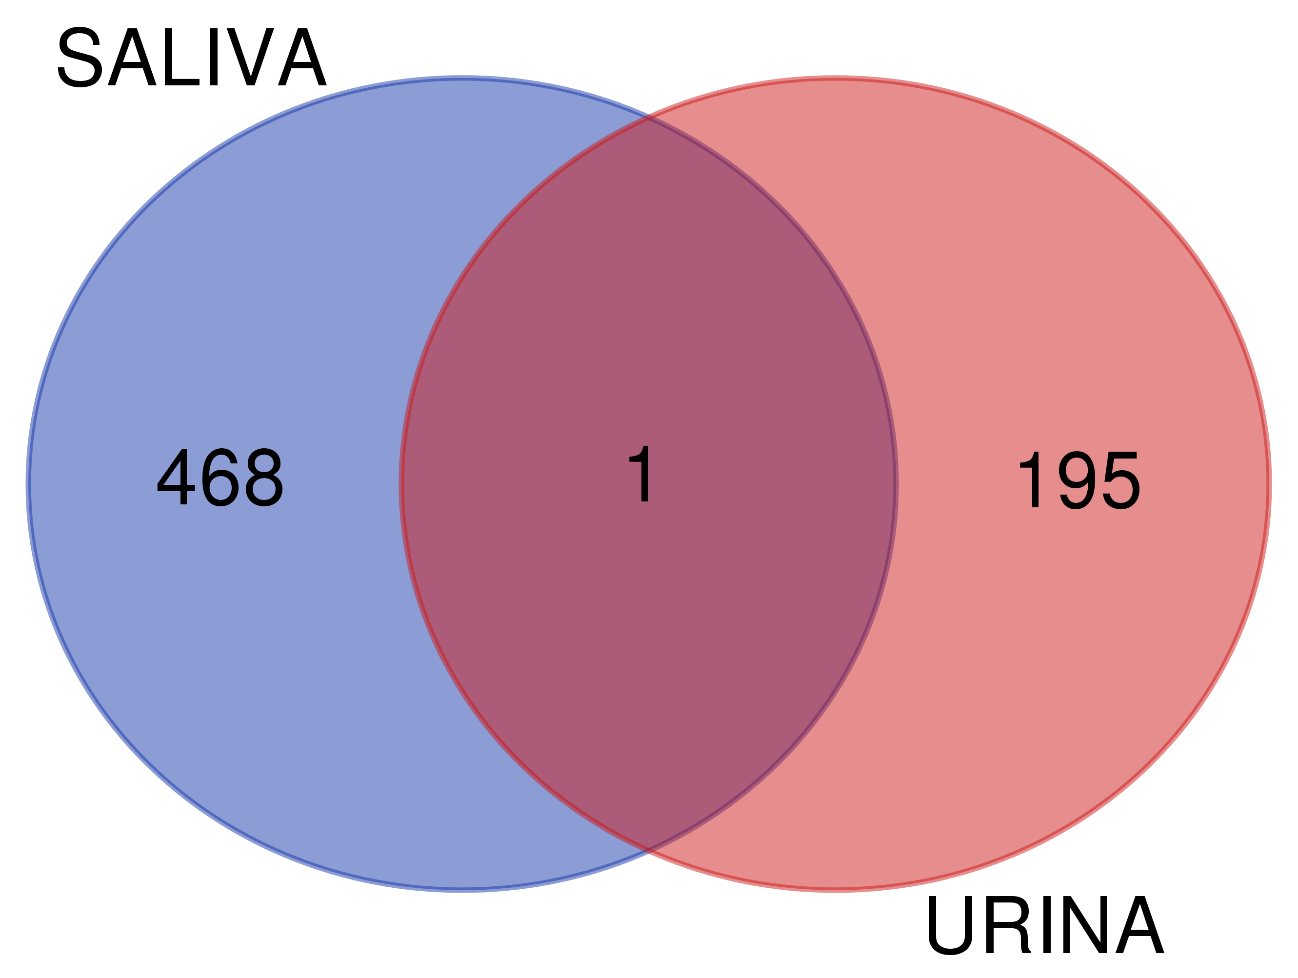
**

**Figura 6**. Diagrama de Venn.

| Tipo | Elementos | Elementos únicos |
| --- | --- | --- |
| SALIVA | 2244 | 469 |
| URINA | 1453 | 196 |
| Total de elementos únicos | | **664** |

**Tabela 14**. Frequências no diagrama de Venn.

Para testar se as diferenças na tabela acima são estatisticamente significativas utilizamos o teste de qui-quadrado. Encontramos que há diferenças estatísticas significativas entre o número de metabólitos únicos em cada Tipo (Χ2=11.07, GL=1, p<0.0001).

**Lista detalhada no anexo em excel.**

## Somente para grupo G3


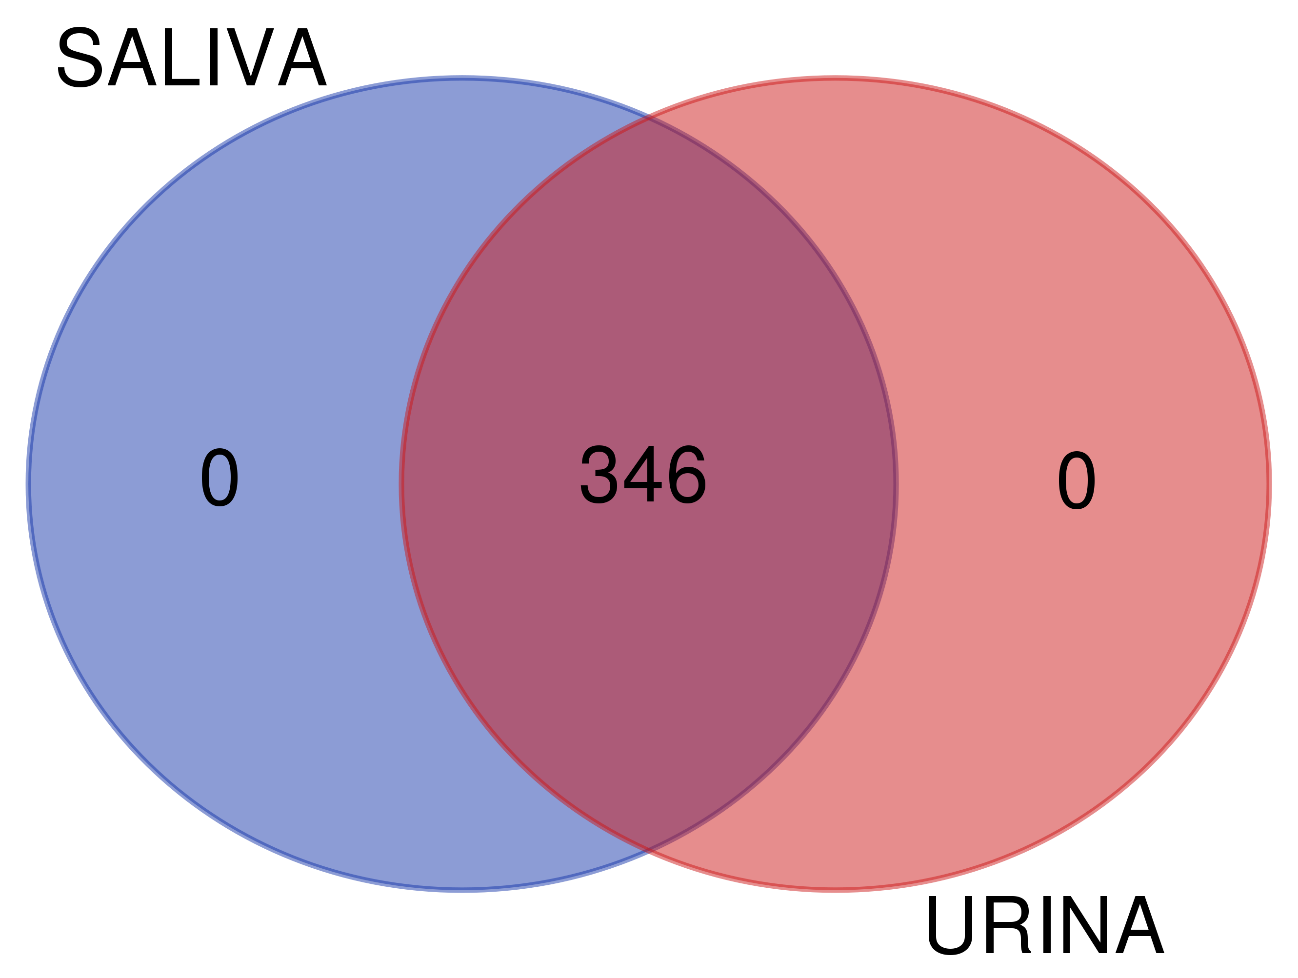


**Figura 7**. Diagrama de Venn.

Para G3 há uma curiosidade, todos os 346 metabólitos únicos encontrados estão presentes tanto na urina quanto na saliva, não havendo qualquer metabólito único de urina ou saliva para o grupo.

(Aqui não há necessidade do teste estatístico de qui-quadrado, pois não há diferenças há serem testadas).

| Tipo | Elementos | Elementos únicos |
| --- | --- | --- |
| SALIVA | 1300 | 346 |
| URINA | 1300 | 346 |
| Total de elementos únicos | | **346** |
|  | |  |

**Tabela 15**. Frequências no diagrama de Venn.

Detalhes no arquivo complementar em excel.

## Somente para o grupo G4


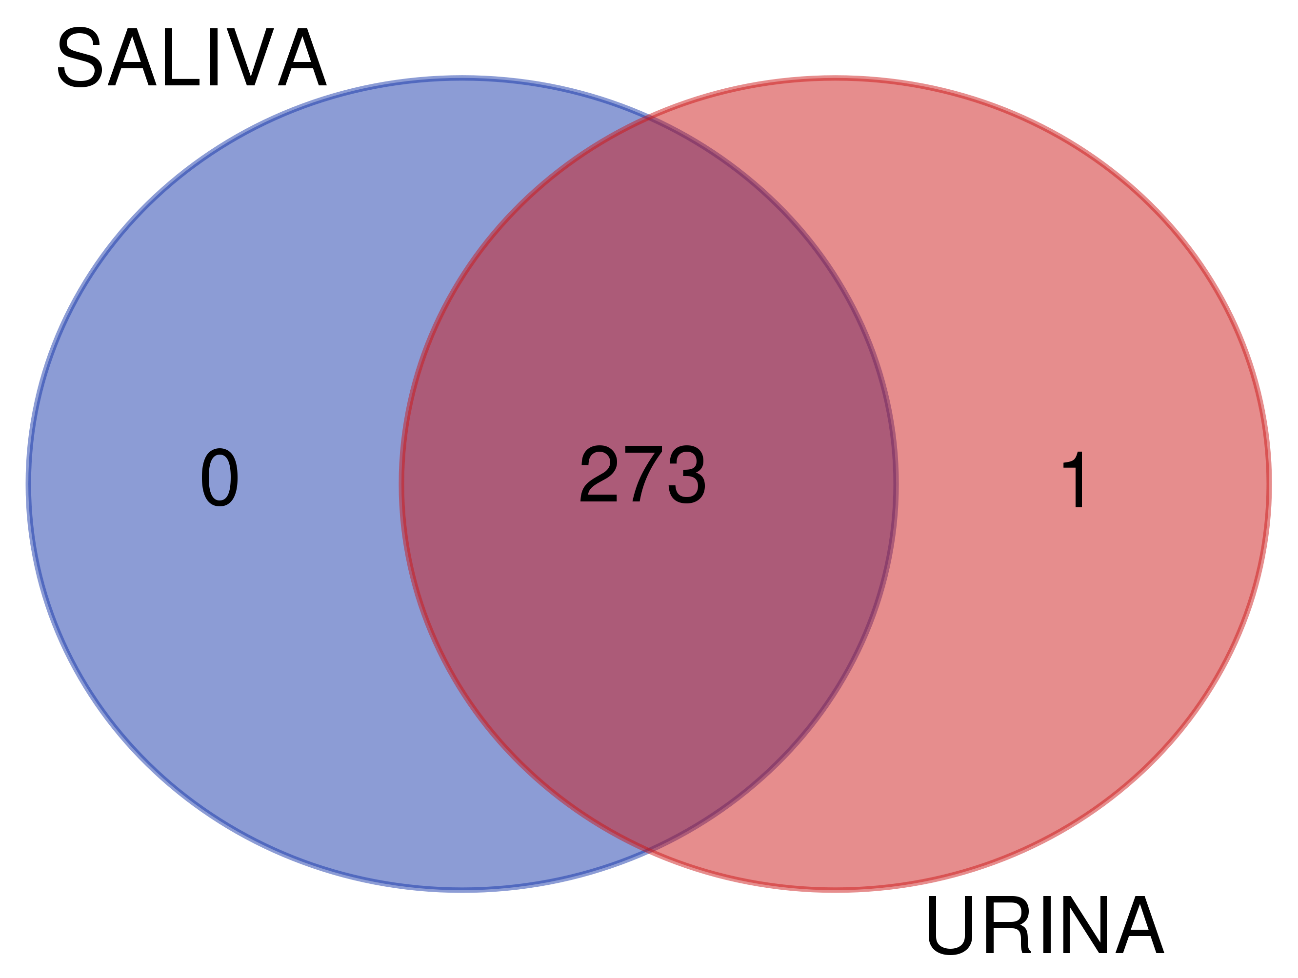


**Figura 8**. Diagrama de Venn.

| Tipo | Elementos | Elementos únicos |
| --- | --- | --- |
| SALIVA | 1253 | 273 |
| URINA | 1256 | 274 |
| Total de elementos únicos | | **275** |
|  | |  |

**Tabela 16**. Frequências no diagrama de Venn.

Não Há diferenças estatísticas significativas para o grupo G4 (Χ2=000.1, GL=1, p=0.969)

# Referências

Benesty, Jacob; Chen, Jingdong ; Huang, Yiteng ; Cohen, Israel. Noise Reduction in Speech Processing pp 1-4 Pearson Correlation Coefficient. 2009. DOI: 10.1007/978-3-642-00296-0_5

Chang CH, Pal N. A revisit to the Behrens-Fisher problem: Comparison of ve test meth-ods. *Commun Stat Simul Comput*. 2008; 37(6): 1064-1085. doi: https://doi.org/10.1080/03610910802049599 [[Google Scholar](https://scholar.google.com/scholar_lookup?journal=Commun+Stat+Simul+Comput&title=A+revisit+to+the+Behrens-Fisher+problem:+Comparison+of+ve+test+meth-ods&author=CH+Chang&author=N.+Pal&volume=37&issue=6&publication_year=2008&pages=1064-1085&)]

Daya S. The t-test for comparing means of two groups of equal size. *Evidence-based Obstetrics & Gynecology*. 2003; 5(1): 4-5. doi: https://doi.org/10.1016/S1361-259X(03)00054-0 [[Google Scholar](https://scholar.google.com/scholar_lookup?journal=Evidence-based+Obstetrics+&+Gynecology&title=The+t-test+for+comparing+means+of+two+groups+of+equal+size&author=S.+Daya&volume=5&issue=1&publication_year=2003&pages=4-5&)]

Kirkwood BR, Sterne JAC. *Essential Medical Statistics*, 2nd ed. United Kingdom, Oxford: Blackwell; 2003. pp: 58-79 [[Google Scholar](https://scholar.google.com/scholar_lookup?title=Essential+Medical+Statistics&author=BR+Kirkwood&author=JAC+Sterne&publication_year=2003&)]

S.F. Arnold. The Theory of Linear Models and Multivariate Analysis Wiley, New York (1981).

T.A. Bancroft, Topics in Intermediate Statistical MethodsIowa State Press, Ames, IA (1968).
